# Supplementary material
Source: PubMed Central journal article supplement (PMC2949524)

**SUPPLEMENTARY FIGURE 1, Brafman et al.**

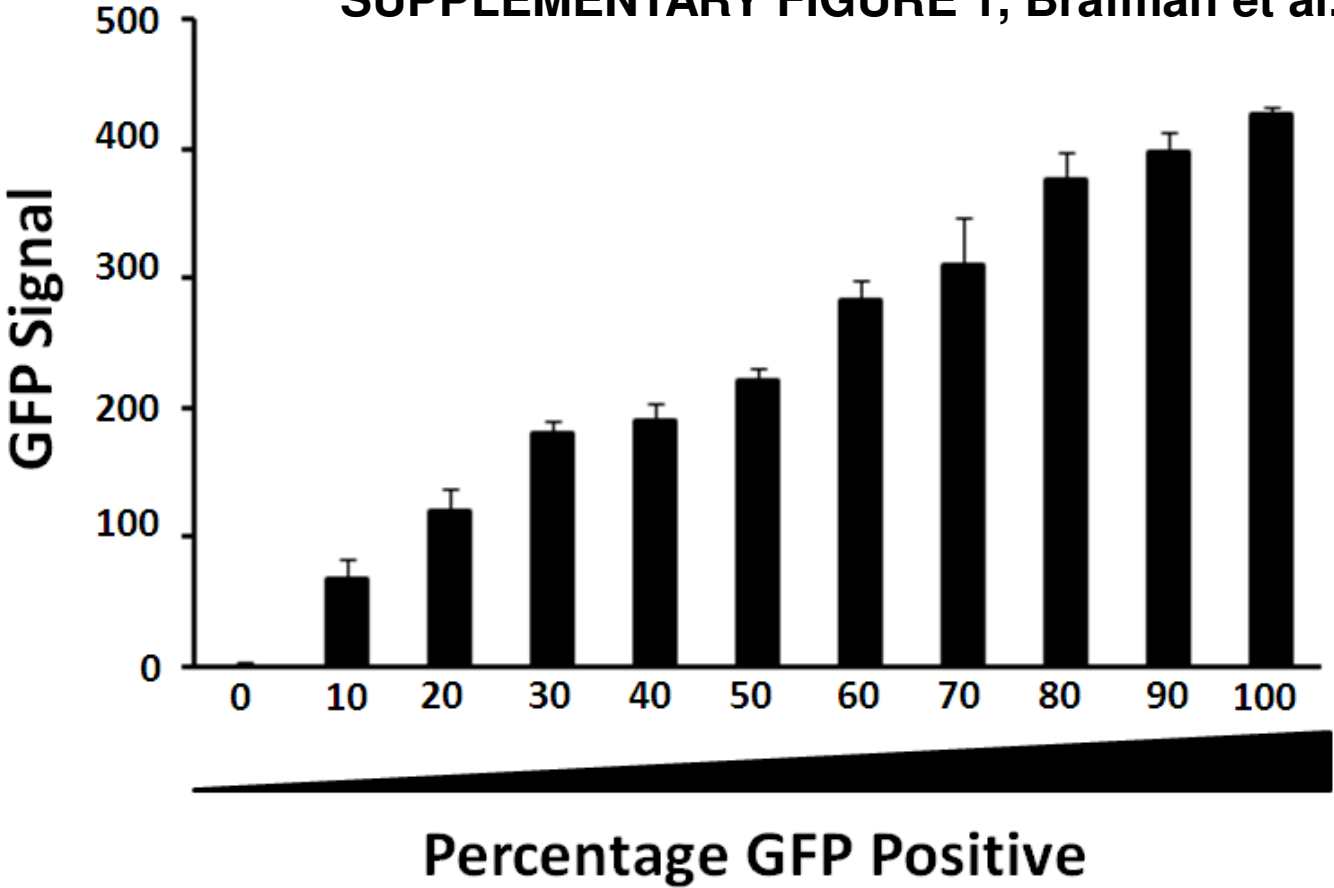

**a** SUPPLEMENTARY FIGURE 2, Brafman et al.

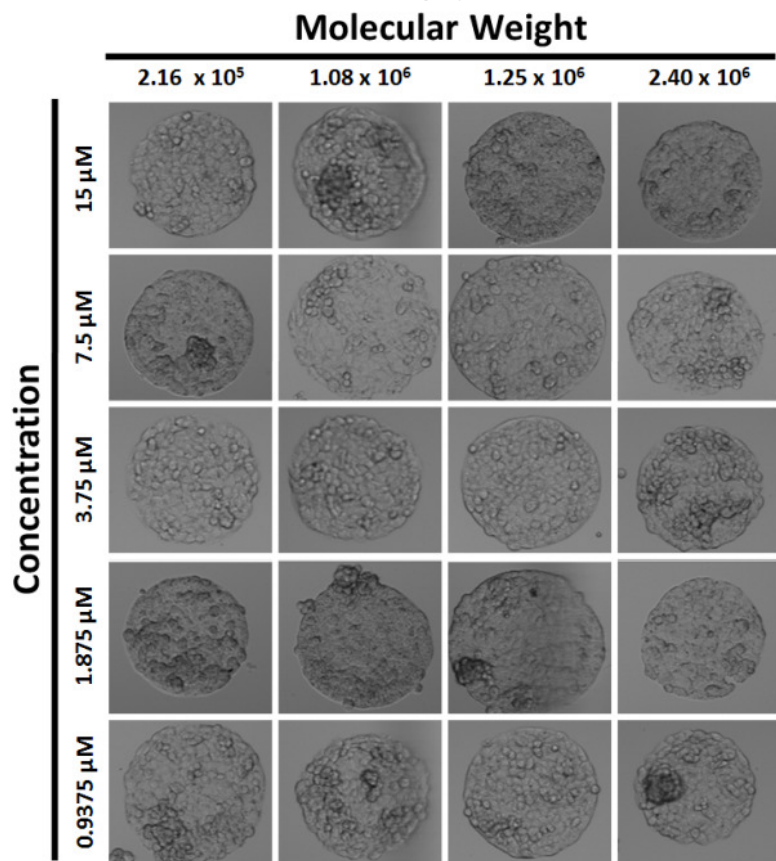

**b**

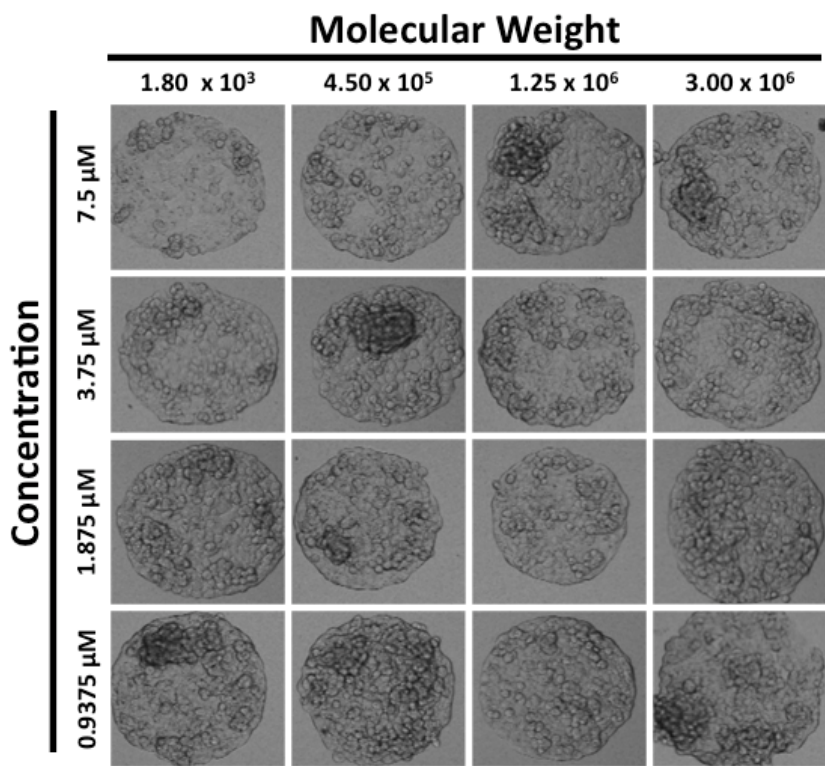

**SUPPLEMENTARY FIGURE 3, Brafman et al.**

**Phase**

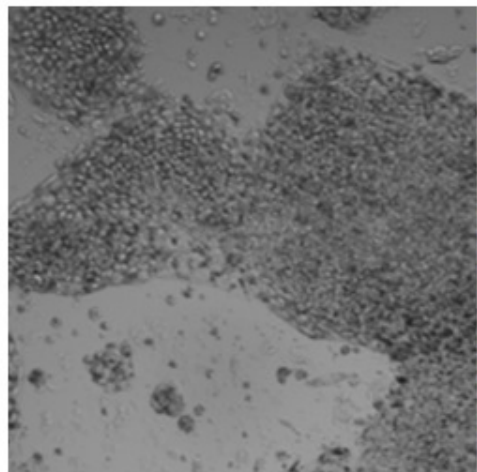

**Hoechst**

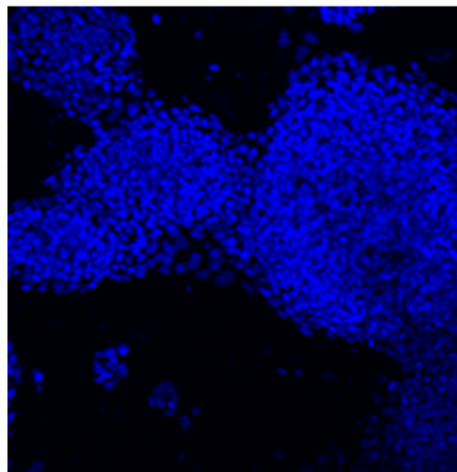

**OCT4**

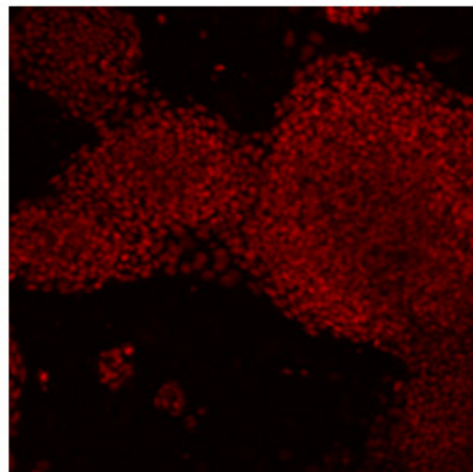

# SUPPLEMENTARY FIGURE 4, Brafman et al.

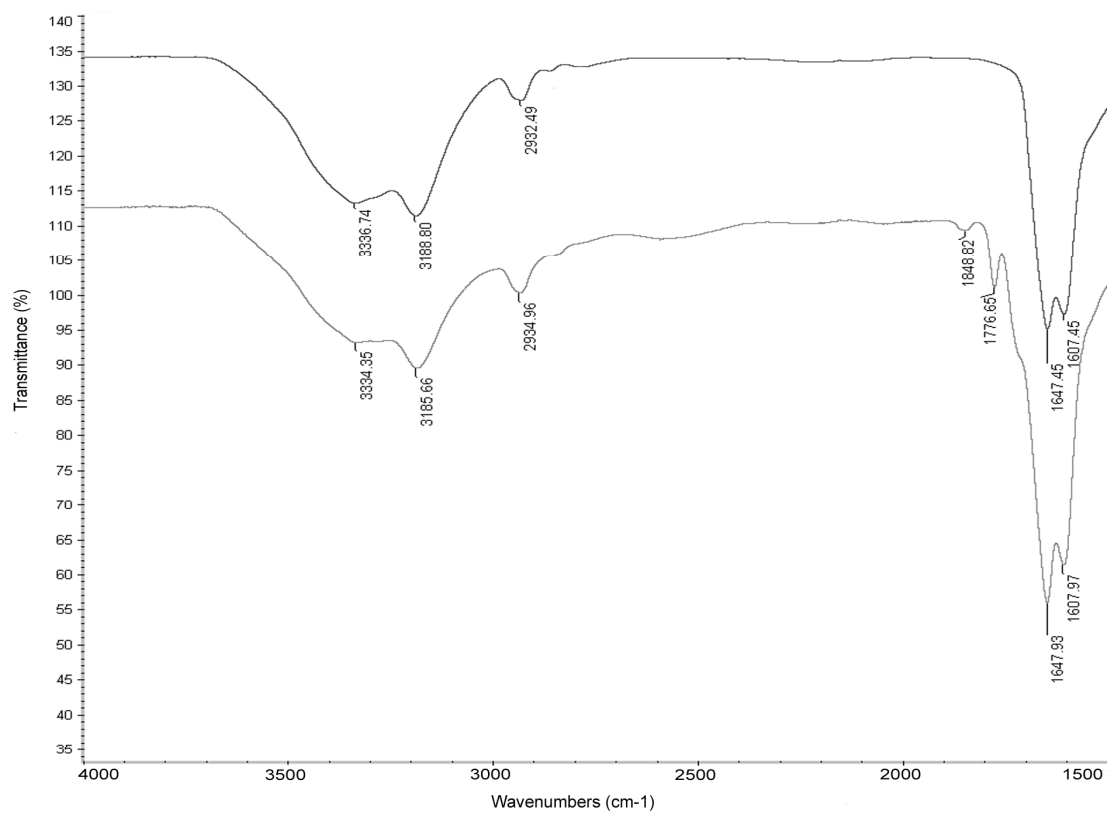

Supplement: NIHMS230447-supplement-01.pdf [file NIHMS230447-supplement-01.pdf]
